# Supplementary material
Source: publisher figshare collection journal article supplement (https://gsapubs.figshare.com/ndownloader/files/23320724)
Supplement: Supplementary file 1 [file 23320724]

## Sheet: Table DR1
					Zircon U-Pb isotopic data of felsic granulite in the Bashiwake area, South Altyn Tagh
Spots	Pb	Th232	U238	Th/U	207Pb/206Pb	207Pb/206Pb	207Pb/235U	207Pb/235U	206Pb/238U	206Pb/238U	207Pb/206Pb	207Pb/206Pb	207Pb/235U	207Pb/235U	206Pb/238U	206Pb/238U
				Ratio	Ratio	1sigma	Ratio	1sigma	Ratio	1sigma	Age (Ma)	1sigma	Age (Ma)	1sigma	Age (Ma)	1sigma
1	104	38	69	0.55	0.07	0.00273	1.41599	0.05062	0.14806	0.00365	939	80	896	21	890	21
2	242	261	194	1.35	0.07	0.00183	1.45121	0.03295	0.14996	0.00223	943	54	910	14	901	12
3	249	104	259	0.4	0.07	0.00142	1.28583	0.02386	0.13679	0.00166	880	43	839	11	826	9
4	179	68	121	0.56	0.07	0.00304	1.27549	0.06273	0.13614	0.00416	865	93	835	28	823	24
5	180	69	116	0.6	0.07	0.00182	1.48873	0.03397	0.1505	0.00254	991	51	926	14	904	14
6	146	62	208	0.3	0.07	0.00166	1.44875	0.0339	0.14833	0.00196	946	48	909	14	892	11
7	539	205	189	1.08	0.07	0.00158	1.41472	0.02883	0.14831	0.00188	906	46	895	12	891	11
8	288	90	219	0.41	0.07	0.00204	1.47613	0.04096	0.15408	0.00233	909	59	921	17	924	13
9	308	95	476	0.2	0.07	0.00172	1.44219	0.03266	0.15036	0.00246	922	51	907	14	903	14
10	202	72	197	0.37	0.07	0.00273	1.25312	0.04585	0.1359	0.00254	837	85	825	21	821	14
11	336	227	258	0.88	0.06	0.00125	0.62248	0.01252	0.07884	0.0009	522	48	491	8	489	5
12	75	45	235	0.19	0.06	0.00188	0.62824	0.01882	0.07966	0.00151	506	72	495	12	494	9
13	54	33	211	0.16	0.06	0.00201	0.62586	0.02157	0.07931	0.00159	506	78	494	13	492	10
14	312	218	191	1.14	0.06	0.00189	0.64348	0.02117	0.08032	0.00126	528	70	504	13	498	8
15	85	55	337	0.16	0.06	0.00188	0.65317	0.01909	0.08064	0.00108	561	64	510	12	500	6
16	608	426	407	1.05	0.06	0.00161	0.64122	0.0174	0.0809	0.00123	506	61	503	11	501	7
17	553	678	722	0.94	0.06	0.00143	0.65173	0.01568	0.0822	0.00109	498	56	510	10	509	7
18	97	61	389	0.16	0.06	0.00187	0.63965	0.01855	0.07977	0.0014	539	66	502	11	495	8

## Sheet: Table DR2
Rare elements of zircon (LA-ICP-MS) for felsic granulite in the Bashiwake area, South Altyn Tagh
Spots	Ti	La	Ce	Pr	Nd	Sm	Eu	Gd	Tb	Dy	Ho	Er	Tm	Yb	Lu
1	4.65	2.19	12.9	2.01	8.51	2.53	0.14	8.36	2.05	23.94	9.52	44.74	9.47	89.58	16.81
2	30.43	1.96	114.15	6.33	32.76	20.8	0.76	32.02	8.73	81.6	26.24	126.27	23.01	211.67	38.77
3	6.29	0.12	1.36	0.15	1.48	4.41	0.06	29.34	11.63	124.33	38.28	166	28.76	240.86	43.05
4	4.03	0.08	1.27	0.14	1.73	4.05	0.05	28.47	9.8	129.76	47.8	248.57	46.78	442.38	79.91
5	5.25	0.1	1.24	0.09	1.14	2.52	0.05	20.95	6.82	80.99	29.05	143.36	27.13	245.09	45.22
6	10.75	1.32	38.52	3.01	15.98	11.26	0.32	33.6	8.95	91.6	30.89	142.88	26.14	231.77	42.17
7	3.57	0	2.48	0.21	3.25	7.07	0.24	47.35	15.49	183.61	67.51	328.89	61.93	564.34	101.49
8	9.62	0.23	1.96	0.2	1.87	4.45	0.1	36.09	13.51	170.06	61.44	288.91	57.79	547.23	95.7
9	5.86	0.05	0.91	0.08	0.97	3.54	0.05	31.91	11.45	118.32	30.8	107.35	18.76	152.07	23.94
10	20.37	0.16	1.43	0.11	1.84	4.14	0.05	29.1	10.16	118.45	39.13	161.36	30.35	278.49	46.49
11	8.33	0.02	15.91	0.08	1.26	1.48	0.14	3.63	1	7.42	1.72	5.85	0.85	6.77	0.89
12	6.81	0.01	2.88	0.02	0.43	0.88	0.17	4.34	1.64	17.72	6.21	29.19	5.48	50.18	8.98
13	5.66	0.01	1.61	0	0.17	0.26	0.08	1.8	0.48	3.66	0.93	3.57	0.56	3.88	0.56
14	10.57	0.01	13.51	0.11	1.78	1.99	0.26	7.59	1.92	12.93	3.12	10.91	1.49	11.12	1.58
15	8.68	0	3.77	0.03	0.35	0.61	0.19	2.73	0.69	7.07	1.65	5.89	0.91	6.38	1.09
16	13.81	0.01	24.83	0.22	1.83	2.96	0.24	10.21	2.32	15.43	3.62	12.99	1.92	14.64	2.19
17	24.47	0.03	32.22	0.33	4.28	5.72	0.66	21.69	4.72	34.61	8.01	24.77	3.65	27.48	3.75
18	9.17	6.41	20.51	2.17	7.46	2.45	0.27	16.64	0.85	6.57	1.61	5.25	0.89	6.79	1.01

## Sheet: Table DR3
Analytical Hf isotope of zircons from the felsic granulite in the Bashiwake area, South Altyn Tagh
Spots	age (Ma)	176Hf/177Hf	error	176Lu/177Hf	error	176Yb/177Hf	error	eHf (T)	eHf (T) error	TDM	TDMC
1	900	0.28216	1.7e-05	0.000946	3e-06	0.03744	1.9e-05	-2.34	0.6	1537	1920
2	900	0.282176	1.8e-05	0.001429	6e-06	0.057368	8.3e-05	-2.03	0.7	1533	1901
3	500	0.282276	1.3e-05	3.7e-05	1e-06	0.001574	1.1e-05	-6.56	0.4	1343	1883
4	500	0.28236	1e-05	3e-05	1e-06	0.001526	3.9e-05	-3.57	0.4	1228	1694
5	900	0.282119	1.3e-05	0.000551	3e-06	0.023839	0.000115	-3.53	0.5	1577	1995
6	900	0.28223	1.6e-05	0.001314	7e-06	0.0532766	0.000299	-0.16	0.6	1457	1783
7	900	0.28216	1.3e-05	0.000779	1e-05	0.032407	0.0004	-2.23	0.5	1530	1913
8	900	0.282161	1.3e-05	0.000984	1.1e-05	0.040859	0.000475	-2.3	0.5	1536	1918
9	900	0.282161	1.2e-05	0.000836	1.2e-05	0.034255	0.000548	-2.23	0.4	1531	1913
10	500	0.282219	1.4e-05	0.002002	1.1e-05	0.079914	0.000727	-9.22	0.5	1496	2050
11	900	0.282182	1.2e-05	0.001613	9e-06	0.068336	0.000542	-1.94	0.4	1533	1895
12	500	0.28239	1.1e-05	1.9e-05	1e-06	0.000834	3.3e-05	-2.51	0.4	1187	1627
13	900	0.282144	1.4e-05	0.001351	1.8e-05	0.055508	0.000418	-3.13	0.5	1576	1970
14	900	0.282182	1.1e-05	0.001098	4e-06	0.045908	0.000406	-1.63	0.4	1512	1875
15	900	0.282168	1.6e-05	0.001696	1.3e-05	0.075028	0.000417	-2.49	0.6	1556	1929
16	500	0.28233	1.1e-05	8.5e-05	1e-06	0.00387	3.7e-05	-4.66	0.4	1271	1763
17	500	0.282374	1.2e-05	7.7e-05	1e-06	0.00391	3.5e-05	-3.08	0.4	1210	1663
18	500	0.282301	1.3e-05	0.000422	5e-06	0.020626	0.000227	-5.8	0.5	1323	1835

## Sheet: Table DR4
Monazite U-Pb isotopic data of felsic granulite (AQ11-3-3.1) in the Bashiwake area, South Altyn Tagh
Spots	Pb	U	Th	Th/U	207Pb/206Pb	2σ	207Pb/235U	2σ	206Pb/238U	2σ	208Pb/232Th	2σ	206Pb/238U	2σ	208Pb/232Th	2σ
	(ppm)	(ppm)	(ppm)			(%)		(%)		(%)		(%)	(Ma)	abs	(Ma)	abs
1	270	2490	7590	2.8	0.05813	0.82	0.6288	2.47	0.07863	2.33	0.02515	1.89	487.9	11.4	502	9.5
2	434	3400	13700	3.2	0.0644	2.17	0.679	3.01	0.0762	2.08	0.0243	2.1	473.4	9.9	485.3	10.2
3	424.5	5510	12200	2.1	0.06091	0.83	0.6502	2.61	0.07722	2.47	0.02483	1.63	479.5	11.9	495.7	8.1
4	295	3818	8650	2.2	0.05853	0.81	0.6207	2.18	0.077	2.03	0.02431	1.74	478.2	9.7	485.5	8.4
5	1649	7850	49150	6.6	0.05791	0.59	0.6129	2.51	0.0771	2.44	0.02418	2.04	478.8	11.7	482.9	9.8
6	1922	7560	57400	8	0.05749	0.63	0.618	2.38	0.0781	2.29	0.02423	2.24	484.8	11.1	483.9	10.8
7	1560	5610	46010	8.5	0.05771	0.66	0.617	2.27	0.0778	2.17	0.02477	2.16	483	10.5	494.6	10.7
8	1650	4390	45800	10.1	0.0761	1.13	0.848	2.47	0.0804	2.19	0.02604	2.23	498.5	10.9	519.6	11.6
9	2549	8640	76900	9	0.05727	0.56	0.6184	2.24	0.0784	2.17	0.02376	1.94	486.6	10.6	474.6	9.2
10	1632	5170	48670	9.9	0.05822	0.73	0.626	2.1	0.0785	1.97	0.02417	2.12	487.2	9.6	482.7	10.2

## Sheet: Table DR5
REEs (ppm) of monazite (LA-ICP-MS) from felsic granulite in the Bashiwake area, South Altyn Tagh
Sample	La	Ce	Pr	Nd	Sm	Eu	Gd	Tb	Dy	Ho	Er	Tm	Yb	Lu	Y
1	135321	293165	39048	158073	24563	1045	7682	430	891	54	54	3.8	12.6	0.6	881
2	126354	295095	38654	150139	22766	837	5396	346	643	47	37	2.2	7.2	0.4	1084
3	130287	301142	38337	155246	23641	1016	7760	465	1116	69	68	4.4	16.5	1.3	948
4	129688	312252	41531	154663	26508	797	7660	404	898	56	50	2.9	10.4	0.8	1191
5	119695	300245	30313	147233	29293	1173	8664	752	1020	89	55	3.4	17.4	1.5	1059
6	133654	324581	32351	145983	28603	1159	9474	524	1098	64	58	3.5	12.8	1	1141
7	128955	315628	38836	142626	26237	997	8446	469	1012	61	52	3.5	11.5	1.1	1158
8	129879	306255	33783	142413	21032	761	7338	575	1122	74	53	3.5	11.9	1	1274
9	127985	311224	35354	139626	21318	800	6469	375	859	51	43	2.7	8.7	0.6	1133
10	128673	309865	36713	141858	23253	1003	6891	383	512	39	40	2.6	3.9	0.6	998
